# Supplementary material
Source: publisher site journal article supplement (https://www.dovepress.com/article/456265)
Supplement: Supplementary file 1 [file get_supplementary_file.php]

**Table S1 The subjects included in (yes) or excluded from (no) the final sample based on the remaining tails in social comparisons and cues**

|  |  |  |  | Remaining trails of social comparison | | | | | |  | Remaining trails of cues | |
| --- | --- | --- | --- | --- | --- | --- | --- | --- | --- | --- | --- | --- |
| subjects | age | sex | Included | upward (S) | equal (S) | downward (S) | upward (R) | equal (R) | downward (R) |  | Status-related | Response-related |
| 9 | 19 | female | yes | 35 | 36 | 36 | 36 | 35 | 36 |  | 106 | 107 |
| 10 | 19 | female | yes | 36 | 32 | 34 | 35 | 36 | 36 |  | 105 | 100 |
| 11 | 21 | female | yes | 33 | 33 | 36 | 34 | 31 | 35 |  | 98 | 98 |
| 12 | 19 | female | yes | 36 | 35 | 36 | 35 | 35 | 35 |  | 103 | 105 |
| 13 | 22 | male | yes | 32 | 34 | 31 | 35 | 32 | 33 |  | 96 | 96 |
| 14 | 19 | male | yes | 36 | 36 | 36 | 36 | 36 | 36 |  | 108 | 108 |
| 15 | 21 | female | yes | 36 | 36 | 35 | 36 | 35 | 35 |  | 106 | 104 |
| 16 | 20 | female | yes | 21 | 20 | 24 | 22 | 24 | 26 |  | 82 | 87 |
| 17 | 20 | female | no | **There were excessive artifacts in EEG recordings** | | | | | | | | |
| 18 | 21 | male | yes | 30 | 31 | 31 | 29 | 33 | 29 |  | 99 | 98 |
| 19 | 21 | male | yes | 36 | 36 | 36 | 35 | 36 | 36 |  | 107 | 107 |
| 20 | 18 | female | yes | 32 | 33 | 31 | 33 | 29 | 31 |  | 97 | 93 |
| 21 | 19 | female | yes | 32 | 32 | 33 | 30 | 30 | 32 |  | 81 | 89 |
| 22 | 19 | male | yes | 36 | 36 | 34 | 36 | 35 | 36 |  | 107 | 107 |
| 23 | 19 | male | yes | 32 | 34 | 32 | 30 | 30 | 31 |  | 87 | 89 |
| 24 | 20 | male | yes | 30 | 28 | 28 | 28 | 25 | 25 |  | 87 | 85 |
| 25 | 19 | male | yes | 36 | 36 | 36 | 36 | 36 | 36 |  | 108 | 107 |
| 26 | 18 | female | yes | 29 | 29 | 32 | 30 | 30 | 29 |  | 89 | 91 |
| 27 | 21 | male | yes | 31 | 34 | 30 | 34 | 35 | 32 |  | 106 | 107 |
| 28 | 18 | female | yes | 29 | 30 | 30 | 33 | 32 | 27 |  | 98 | 100 |
| 29 | 20 | male | yes | 33 | 36 | 34 | 35 | 34 | 34 |  | 100 | 103 |
| 30 | 19 | female | yes | 36 | 33 | 33 | 35 | 33 | 32 |  | 103 | 106 |
| 31 | 20 | female | yes | 35 | 35 | 33 | 34 | 34 | 31 |  | 107 | 107 |
| 32 | 20 | male | yes | 34 | 33 | 35 | 29 | 34 | 32 |  | 97 | 99 |
| 33 | 18 | male | yes | 35 | 36 | 36 | 36 | 35 | 35 |  | 104 | 101 |
| 34 | 21 | male | yes | 34 | 35 | 36 | 36 | 35 | 36 |  | 105 | 103 |
| 35 | 21 | female | yes | 23 | 22 | 26 | 26 | 25 | 23 |  | 69 | 72 |
| 36 | 20 | female | yes | 33 | 36 | 33 | 34 | 33 | 35 |  | 100 | 101 |
| 37 | 19 | male | yes | 34 | 35 | 32 | 30 | 35 | 35 |  | 105 | 94 |
| 38 | 20 | male | yes | 36 | 36 | 36 | 36 | 36 | 35 |  | 108 | 107 |

**The collapsed localizers**

According to previous studies (Luck & Gaspelin, 2016; Sui et al., 2023; Sima et al., 2024), the collapsed localizers were used to identify the time windows and the electrode sites of the ERP components of P3 and LPP according to the following steps.

1. The collapsed waveform for each electrode site was calculated by averaging the six conditions;
2. The peak latency of each ERP component was found by eyeballing the collapsed waveforms;
3. We drew the topographic map of the collapsed waveforms in the time windows of 60 ms for P3 and 100 ms for LPP around the peek latency to find the most active areas of each ERP component.

Based on above steps, the P3 and LPP were analyzed in the time windows of 336~396ms and 450~550ms respectively.


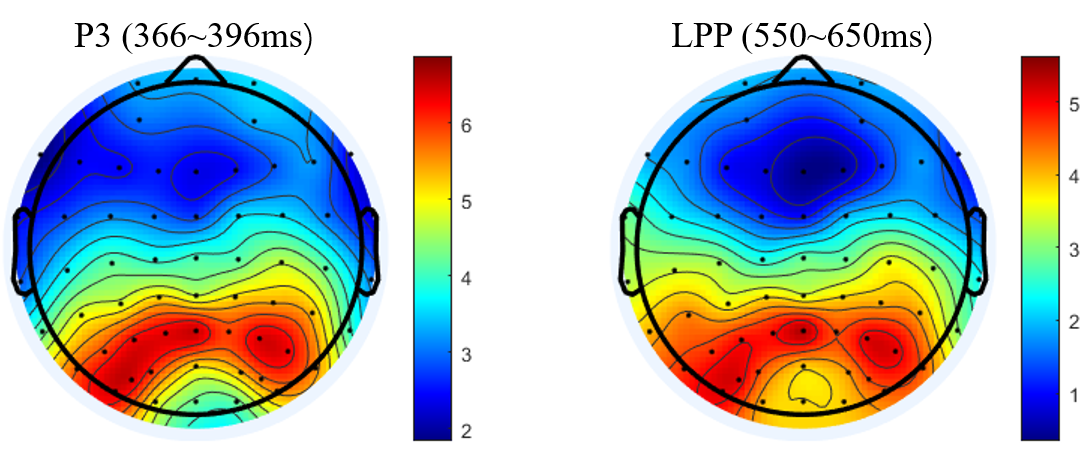


**Figure S1 The topographic maps for the P3 (336~396 ms) and LPP (450~550 ms) based on the collapsed waveforms**
